# Supplementary material
Source: publisher site journal article supplement (https://www.dovepress.com/article/323769)
Supplement: Supplementary file 1 [file get_supplementary_file.php]

**U-shaped association of body mass index with the risk of peripheral arterial disease in Chinese hypertensive population**

**Corresponding authors:**Xiao Huang, drxiaohuang@163.com

OR

Xiaoshu Cheng, xiaoshumenfan@126.com

Supplemental Table 1 Association of BMI and the risk of PAD stratified by BMI threshold

| BMI,kg/m2 (per SD increment) | N | Events ( % ) | Model 3  OR (95% CI) | P value |
| --- | --- | --- | --- | --- |
| Total participants | 10896 | 351(3.2) | 0.96 (0.85, 1.10) | 0.585 |
| <25.7 | 8027 | 278 (3.5) | 0.73 (0.60, 0.89) | 0.002 |
| ≥25.7 | 2869 | 73 (2.5) | 1.52 (1.20, 1.94) | 0.001 |
| P for interaction |  |  |  | <0.001 |
| Log Likelihood Ratio Tests |  |  |  | 0.002 |

Model 3 adjust for : age, sex, systolic and diastolic blood pressure, pulse rate, smoking status, alcohol consumption, total cholesterol, triglyceride, high density lipoprotein cholesterol, estimated glomerular filtration rate, total homocysteine, antihypertensive drugs, lipid-lowering drugs, diabetes mellitus, stroke, coronary heart disease.

CI = confidence interval; BMI = Body Mass Index; PAD = peripheral arterial disease.
